# Supplementary material
Source: Springer Nature journal article supplement (https://www.springermedizin.de/resource/supplementary/12937_2009_279_MOESM3_ESM.pdf/25654772)

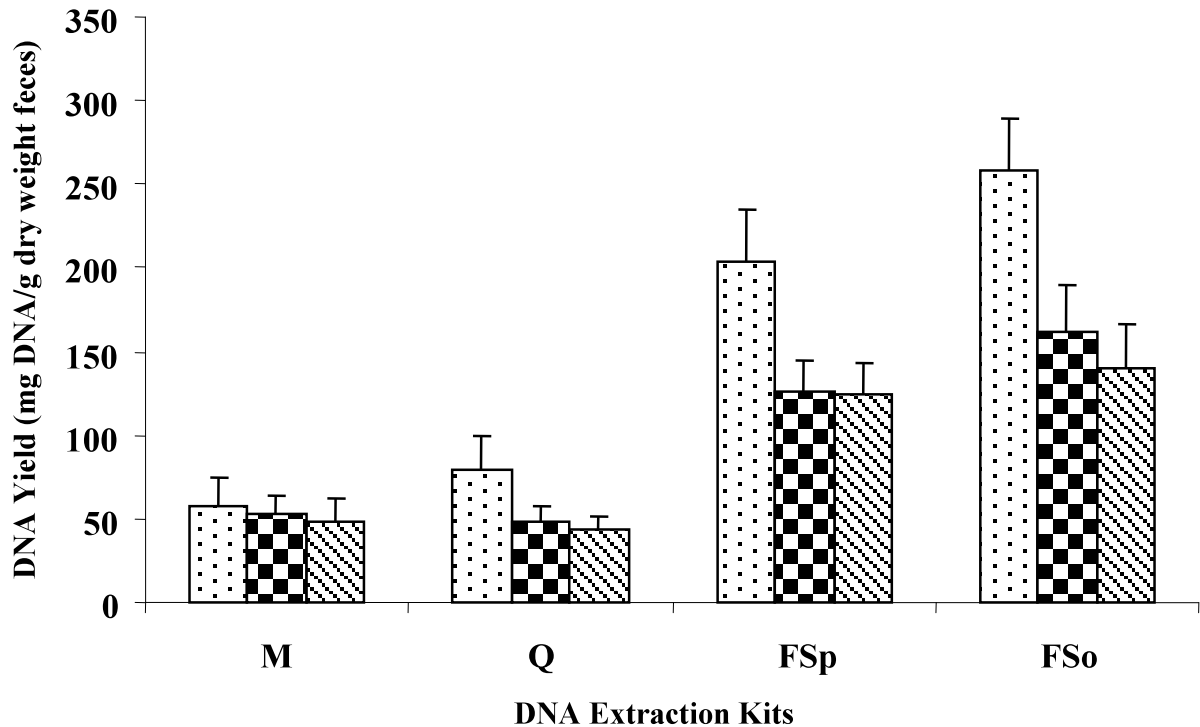

□ 26% Dry Matter ▣ 35% Dry Matter ▤ 41% Dry Matter

Supplement: MOESM3 [file 25654772]
